# Supplementary material for: Synthesis, structure and properties of a calcium oxonitridosilicate phosphor showing green or red luminescence upon doping with Eu2+ or Ce3+
Source: Royal Society of Chemistry journal article supplement (doi:10.1039/c9dt02564b), 2019-01-01
Supplement: c9dt02564b1.pdf [file c9dt02564b1.pdf]

## Supporting Information

### **Synthesis, Structure and Properties of a Calcium Oxonitridosilicate Phosphor Showing Green or Red Luminescence upon Doping with $\text{Eu}^{2+}$ or $\text{Ce}^{3+}$**

Robert Schmidt,<sup>a</sup> Markus Ströbele,<sup>a</sup> Carl P. Romao,<sup>a</sup> David Enseling,<sup>b</sup> Thomas Jüstel,<sup>b</sup> Hans-Jürgen Meyer<sup>a\*</sup>

<sup>a</sup> Section for Solid State and Theoretical Inorganic Chemistry, Institute of Inorganic Chemistry, University of Tübingen, Auf der Morgenstelle 18, D-72076 Tübingen, Germany

<sup>b</sup> Institute of Optical Technologies, Department Chemical Engineering, Münster University of Applied Sciences, Stegerwaldstrasse 29, D-48565 Steinfurt, Germany.

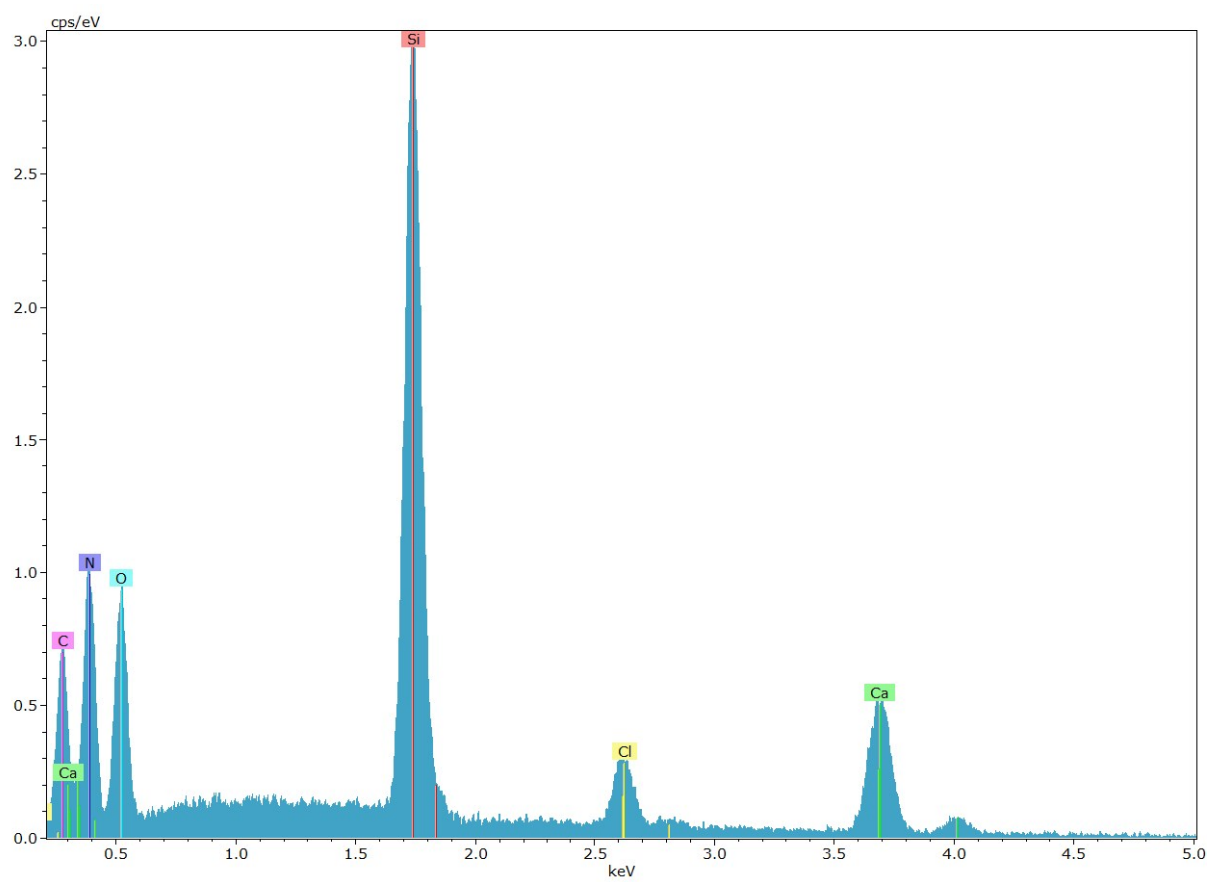

**Figure S1.** Exemplary EDX-Spectra of  $\text{Li}_x\text{Ca}_{16-x}\text{Si}_{17}\text{N}_{32-x}\text{O}_{2+x}$ .

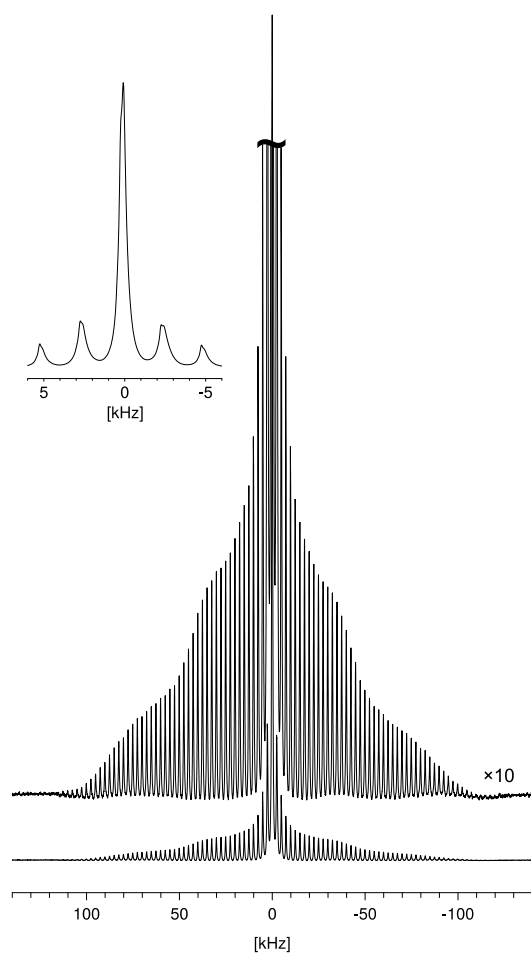

**Figure S2.**  ${}^7\text{Li}$  MAS NMR spectrum of  $\text{Li}_x\text{Ca}_{16-x}\text{Si}_{17}\text{N}_{32-x}\text{O}_{2+x}$  obtained at 116.64 MHz and a spinning rate of 2.5 kHz. The upper trace shows the satellite transitions, vertically enhanced ten times and cut-off at the heights indicated ( $\sim$ ). The inset shows the isotropic region, with two isotropic peaks at 1.9 and 0.8 ppm.
